# Supplementary material
Source: MDPI journal article supplement (https://www.mdpi.com/1999-4907/12/12/1708)
Supplement: s1 [file s1]

## Supplementary information

**Table S1.** Occurrences used in building models for *Garuga forrestii* using MaxEnt.

|    | Source    | Longitude (E) | Latitude (N) |
|----|-----------|---------------|--------------|
| 1  | GBIF      | 100.2211      | 24.4538      |
| 2  | GBIF      | 103.0866      | 22.7922      |
| 3  | GBIF      | 102.2398      | 24.2713      |
| 4  | GBIF      | 103.3881      | 23.3656      |
| 5  | GBIF      | 102.5935      | 25.8696      |
| 6  | GBIF      | 100.7098      | 24.6157      |
| 7  | GBIF      | 100.2299      | 26.8761      |
| 8  | GBIF      | 99.9285       | 24.5805      |
| 9  | GBIF      | 104.0109      | 28.6727      |
| 10 | GBIF      | 103.5717      | 28.2627      |
| 11 | GBIF      | 100.4525      | 21.9574      |
| 12 | GBIF      | 102.2446      | 26.6553      |
| 13 | Fieldwork | 102.8294      | 27.3561      |
| 14 | Fieldwork | 103.2028      | 27.5297      |
| 15 | Fieldwork | 103.8418      | 28.4584      |
| 16 | Fieldwork | 102.7432      | 26.0487      |
| 17 | Fieldwork | 101.8777      | 26.4453      |
| 18 | Fieldwork | 102.1600      | 24.0012      |
| 19 | Fieldwork | 102.3182      | 23.4184      |
| 20 | Fieldwork | 102.3265      | 23.5713      |
| 21 | Fieldwork | 102.3263      | 23.5713      |
| 22 | Fieldwork | 102.5517      | 23.6550      |
| 23 | Fieldwork | 101.8985      | 23.4832      |
| 24 | Fieldwork | 102.7549      | 23.2657      |

**Table S2.** Pearson's Correlation ( $r = 0.7$ ) matrix of the variables used in modeling the distribution of *Garuga forrestii* in MaxEnt.

| Layer         | PET     | AI      | Elev    | Bio 3   | Bio 4   | Bio 7   | Bio 13  | Bio 15  | Bio 17  |
|---------------|---------|---------|---------|---------|---------|---------|---------|---------|---------|
| <b>PET</b>    | 0.0000  | -0.1492 | -0.6207 | 0.1655  | -0.5083 | -0.6634 | 0.5708  | -0.2231 | 0.4317  |
| <b>AI</b>     | -0.1492 | 0.0000  | -0.4237 | -0.5253 | 0.2279  | -0.1982 | 0.4609  | -0.5629 | 0.5987  |
| <b>Elev</b>   | -0.6207 | -0.4237 | 0.0000  | 0.5856  | -0.0870 | 0.5276  | -0.5832 | 0.7178  | -0.7307 |
| <b>Bio 3</b>  | 0.1655  | -0.5253 | 0.5856  | 0.0000  | -0.7997 | -0.1722 | -0.0078 | 0.7042  | -0.4978 |
| <b>Bio 4</b>  | -0.5083 | 0.2279  | -0.0870 | -0.7997 | 0.0000  | 0.7150  | -0.4387 | -0.3932 | 0.1166  |
| <b>Bio 7</b>  | -0.6634 | -0.1982 | 0.5276  | -0.1722 | 0.7150  | 0.0000  | -0.7179 | 0.1650  | -0.4081 |
| <b>Bio 13</b> | 0.5708  | 0.4609  | -0.5832 | -0.0078 | -0.4387 | -0.7179 | 0.0000  | -0.1893 | 0.5500  |
| <b>Bio 15</b> | -0.2231 | -0.5629 | 0.7178  | 0.7042  | -0.3932 | 0.1650  | -0.1893 | 0.0000  | -0.7801 |
| <b>Bio 17</b> | 0.4317  | 0.5987  | -0.7307 | -0.4978 | 0.1166  | -0.4081 | 0.5500  | -0.7801 | 0.0000  |

PET- Potential Evapotranspiration; AI- Aridity Index; Elev- Altitude; Bio 3- Isothermality; Bio 4- Temperature Seasonality; Bio 7- Temperature Annual Range; Bio 13- Precipitation of Wettest Month; Bio 15- Precipitation Seasonality; Bio 17- Precipitation of Driest Quarter.

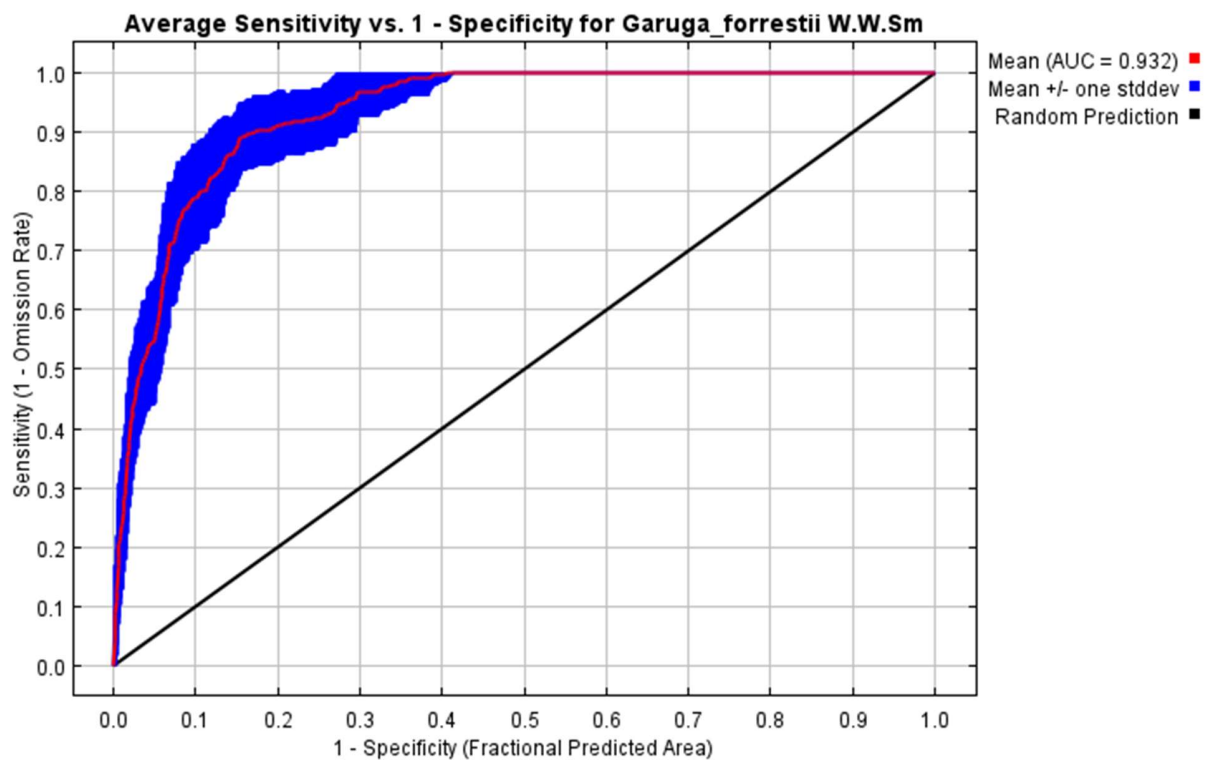

**Figure S1.** AUC results of the current distribution for *Garuga forrestii*.

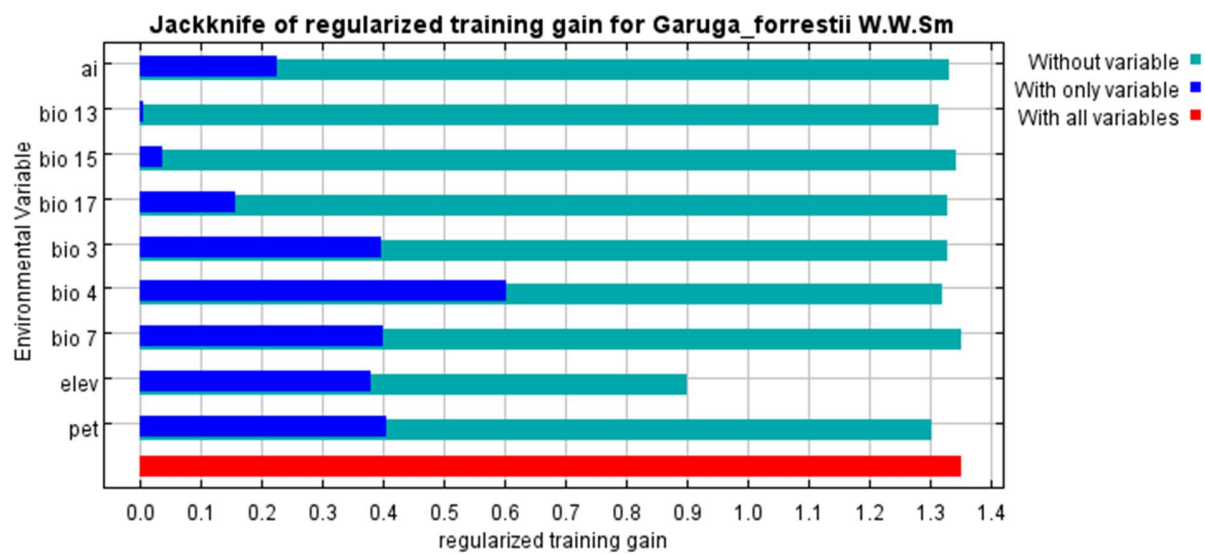

**Figure S2.** Jackknife tests for the potential distribution of *Garuga forrestii* under the current climate scenario.
